# Supplementary material
Source: PubMed Central journal article supplement (PMC10023353)
Supplement: NIHMS1859678-supplement-Related_Manuscript_File.pdf [file NIHMS1859678-supplement-Related_Manuscript_File.pdf]

**Table 1. Characteristics of the sample**

|                                | <b>All<br/>(N=303)</b> | <b>In school<br/>(n=194)</b> | <b>On break<br/>(n=109)</b> | <b>P-value</b>   |
|--------------------------------|------------------------|------------------------------|-----------------------------|------------------|
| <b>Demographics</b>            |                        |                              |                             |                  |
| Female sex, %                  | 47.5%                  | 45.4%                        | 51.4%                       | 0.314            |
| Racial/ethnic minority, %      | 21.5%                  | 20.1%                        | 23.9%                       | 0.445            |
| Age, years                     | 16.2 (2.2)             | 16.0 (2.1)                   | 16.7 (2.4)                  | <b>0.009</b>     |
| Tanner stage, score            | 4.1 (0.8)              | 4.1 (0.8)                    | 4.2 (0.8)                   | 0.155            |
| <b>Anthropometrics</b>         |                        |                              |                             |                  |
| BMI, percentile                | 66.0 (28.0)            | 64.3 (28.7)                  | 69.2 (26.4)                 | 0.143            |
| VAT, cm <sup>2</sup>           | 59.9 (39.4)            | 57.9 (39.5)                  | 63.5 (39.2)                 | 0.236            |
| SAT, cm <sup>2</sup>           | 223.5 (159.0)          | 215.1 (155.0)                | 238.3 (165.5)               | 0.224            |
| <b>Blood pressure</b>          |                        |                              |                             |                  |
| SBP, mmHg                      | 113.2 (11.7)           | 112.5 (11.6)                 | 114.5 (11.6)                | 0.141            |
| DBP, mmHg                      | 66.8 (8.6)             | 66.1 (8.4)                   | 68.1 (8.4)                  | 0.053            |
| <b>Actigraphy</b>              |                        |                              |                             |                  |
| Overall                        |                        |                              |                             |                  |
| Sleep midpoint, hh:mm          | 3:55 (1:31)            | 3:30 (1:34)                  | 4:40 (1:06)                 | <b>&lt;0.001</b> |
| Sleep irregularity, hh:mm      | 0:56 (0:32)            | 0:57 (0:34)                  | 0:54 (0:28)                 | 0.492            |
| Sleep duration, min            | 420.1 (50.0)           | 417.3 (47.9)                 | 425.2 (53.5)                | 0.187            |
| Sleep variability, min         | 71.5 (36.7)            | 68.6 (34.5)                  | 76.5 (40.0)                 | 0.073            |
| Weekdays                       |                        |                              |                             |                  |
| Bedtime, hh:mm                 | 23:23 (1:29)           | 22:59 (1:24)                 | 24:08 (1:20)                | <b>&lt;0.001</b> |
| Rising time, hh:mm             | 7:52 (1:50)            | 7:14 (1:46)                  | 8:59 (1:21)                 | <b>&lt;0.001</b> |
| Sleep midpoint, hh:mm          | 3:04 (1:24)            | 2:36 (1:16)                  | 3:55 (1:13)                 | <b>&lt;0.001</b> |
| Sleep irregularity, hh:mm      | 0:50 (0:48)            | 0:47 (0:54)                  | 0:56 (0:33)                 | 0.116            |
| Sleep duration, min            | 418.6 (53.2)           | 409.9 (48.7)                 | 434.1 (57.4)                | <b>&lt;0.001</b> |
| Sleep variability, min         | 64.0 (40.6)            | 58.3 (37.6)                  | 74.1 (43.8)                 | <b>0.001</b>     |
| Weekends                       |                        |                              |                             |                  |
| Bedtime, hh:mm                 | 23:51 (1:30)           | 23:34 (1:27)                 | 24:20 (1:28)                | <b>&lt;0.001</b> |
| Rising time, hh:mm             | 8:43 (1:26)            | 8:34 (1:32)                  | 8:58 (1:14)                 | <b>0.024</b>     |
| Sleep midpoint, hh:mm          | 3:41 (1:20)            | 3:30 (1:21)                  | 4:02 (1:13)                 | <b>0.001</b>     |
| Sleep irregularity, hh:mm      | n/a                    | n/a                          | n/a                         | n/a              |
| Sleep duration, min            | 446.0 (82.2)           | 459.0 (80.5)                 | 422.5 (80.3)                | <b>&lt;0.001</b> |
| Sleep variability, min         | n/a                    | n/a                          | n/a                         | n/a              |
| Weekends – Weekdays            |                        |                              |                             |                  |
| Bedtime, hh:mm                 | 0:27 (1:10)            | 0:35 (1:13)                  | 0:12 (1:04)                 | <b>0.007</b>     |
| Rising time, hh:mm             | 0:50 (1:44)            | 1:20 (1:42)                  | -0:02 (1:26)                | <b>&lt;0.001</b> |
| Sleep midpoint, hh:mm          | 0:37 (1:23)            | 0:53 (1:27)                  | 0:07 (1:06)                 | <b>&lt;0.001</b> |
| Sleep irregularity, hh:mm      | n/a                    | n/a                          | n/a                         | n/a              |
| Sleep duration, min            | 27.2 (84.6)            | 49.1 (76.4)                  | -12.3 (84.7)                | <b>&lt;0.001</b> |
| Sleep variability, min         | n/a                    | n/a                          | n/a                         | n/a              |
| <b>Morningness-Eveningness</b> |                        |                              |                             |                  |
| Morning-type, %                | 33.3%                  | 32.5%                        | 34.9%                       | 0.357            |
| Intermediate-type, %           | 34.3%                  | 38.1%                        | 27.5%                       |                  |

|                        |              |              |              |              |
|------------------------|--------------|--------------|--------------|--------------|
| Evening-type, %        | 32.3%        | 29.4%        | 37.6%        |              |
| <b>Polysomnography</b> |              |              |              |              |
| Sleep duration, min    | 446.6 (58.3) | 454.6 (52.1) | 432.3 (65.7) | <b>0.001</b> |
| AHI, events / hour     | 2.6 (6.0)    | 2.2 (2.8)    | 3.2 (9.3)    | 0.192        |

---

Data are mean (SD) or % for continuous and categorical variables, respectively. AHI = apnea/hypopnea index; BMI = body mass index; DBP = diastolic blood pressure; n/a = not applicable; SAT = Subcutaneous adipose tissue; SBP = systolic blood pressure; VAT = Visceral adipose tissue. Blood pressure levels between groups adjusted for age. Bold p-values are statistically significant at < 0.05

**Table 2. Association of visceral adiposity and circadian timing of sleep with blood pressure**

|                                         | Over all<br>(N= 303)   |                        | In School<br>(n= 194)             |                                   | On Break<br>(n= 109)               |                                    |
|-----------------------------------------|------------------------|------------------------|-----------------------------------|-----------------------------------|------------------------------------|------------------------------------|
|                                         | SBP                    | DBP                    | SBP                               | DBP                               | SBP                                | DBP                                |
| <b>Sleep Midpoint</b>                   |                        |                        |                                   |                                   |                                    |                                    |
| Visceral Adiposity                      | 3.52 (0.67)<br><0.001* | 1.82 (0.51)<br><0.001* | 4.44 (0.87)<br><0.001*            | 1.99 (0.68)<br>0.004*             | 2.58 (1.09)<br>0.020*              | 2.23 (0.82)<br>0.008*              |
| Sleep Midpoint                          | 1.11 (0.68)<br>0.101   | -0.13 (0.52)<br>0.806  | 1.63 (0.90)<br>0.071 <sup>T</sup> | -0.19 (0.70)<br>0.788             | -2.52 (1.41)<br>0.077 <sup>T</sup> | -2.04 (1.06)<br>0.056 <sup>T</sup> |
| Visceral Adiposity * Sleep Midpoint     | -0.84 (0.64)<br>0.195  | 0.04 (0.49)<br>0.936   | 1.27 (0.94)<br>0.179              | 1.29 (0.73)<br>0.078 <sup>T</sup> | -1.95 (1.19)<br>0.104              | -1.28 (0.89)<br>0.153              |
| <b>Sleep Regularity</b>                 |                        |                        |                                   |                                   |                                    |                                    |
| Visceral Adiposity                      | 3.48 (0.67)<br><0.001* | 1.80 (0.51)<br><0.001* | 4.26 (0.88)<br><0.001*            | 1.95 (0.67)<br>0.004*             | 2.48 (1.11)<br>0.027*              | 2.15 (0.83)<br>0.011*              |
| Sleep Irregularity                      | 0.03 (0.65)<br>0.965   | -0.45 (0.50)<br>0.371  | 0.03 (0.79)<br>0.966              | -0.76 (0.60)<br>0.211             | 0.05 (1.19)<br>0.966               | -0.11 (0.89)<br>0.899              |
| Visceral Adiposity * Sleep Irregularity | 1.45 (0.53)<br>0.007*  | 0.94 (0.41)<br>0.022*  | 1.67 (0.59)<br>0.005*             | 1.36 (0.45)<br>0.003*             | 1.17 (1.22)<br>0.340               | -0.50 (0.92)<br>0.591              |

Data are unstandardized regression coefficients (standard error) p-value for each standard deviation increase (z-scores) associated with each independent variable (main effects without interaction in the model) and their interaction (with main effects in the model).

Adjusted for sex, age, race/ethnicity, polysomnography-measured apnea/hypopnea index, actigraphy-measured sleep duration, and actigraphy-measured sleep variability. \* p-value<0.05, <sup>T</sup> 0.05<p-value<0.10

**Table 3. Association of visceral adiposity and circadian timing of sleep during weekdays and weekends with blood pressure as a function of being in school vs. on break**

|                                         | In School                       |                    | On Break                        |                    |
|-----------------------------------------|---------------------------------|--------------------|---------------------------------|--------------------|
|                                         | SBP                             | DBP                | SBP                             | DBP                |
| <b>Weekdays</b>                         |                                 |                    |                                 |                    |
| Visceral Adiposity                      | 4.43 (0.87) <0.001*             | 1.99 (0.67) 0.003* | 2.18 (1.08) 0.046*              | 1.88 (0.82) 0.023* |
| Sleep Midpoint                          | 2.01 (1.13) 0.076 <sup>T</sup>  | 0.58 (0.87) 0.504  | -2.54 (1.29) 0.052 <sup>T</sup> | -1.51 (0.98) 0.124 |
| Visceral Adiposity * Sleep Midpoint     | 1.82 (0.81) 0.026*              | 1.27 (0.62) 0.043* | -0.54 (1.15) 0.642              | -0.24 (0.87) 0.787 |
| Visceral Adiposity                      | 4.36 (0.87) <0.001*             | 1.94 (0.67) 0.004* | 2.25 (1.10) 0.044*              | 1.91 (0.83) 0.023* |
| Sleep Irregularity                      | 1.02 (0.72) 0.160               | -0.23 (0.55) 0.684 | -0.98 (1.75) 0.578              | -0.86 (1.31) 0.512 |
| Visceral Adiposity * Sleep Irregularity | 0.44 (1.03) 0.667               | 0.55 (0.79) 0.490  | 2.92 (1.36) 0.034*              | 0.95 (1.04) 0.363  |
| <b>Weekends</b>                         |                                 |                    |                                 |                    |
| Visceral Adiposity                      | 4.36 (0.87) <0.001*             | 2.03 (0.67) 0.003* | 2.54 (1.12) 0.025*              | 2.21 (0.84) 0.010* |
| Sleep Midpoint                          | -0.20 (0.80) 0.800              | -0.24 (0.62) 0.697 | -1.40 (1.28) 0.278              | -0.27 (0.96) 0.776 |
| Visceral Adiposity * Sleep Midpoint     | -0.27 (0.76) 0.724              | 0.57 (0.59) 0.328  | -2.43 (1.36) 0.077 <sup>T</sup> | -0.60 (1.04) 0.566 |
| <b>Weekends – Weekdays</b>              |                                 |                    |                                 |                    |
| Visceral Adiposity                      | 4.20 (0.87) <0.001*             | 1.99 (0.67) 0.004* | 2.41 (1.11) 0.033*              | 2.08 (0.83) 0.014* |
| ΔSleep Midpoint                         | -1.47 (0.75) 0.051 <sup>T</sup> | -0.51 (0.58) 0.374 | 1.31 (1.27) 0.305               | 1.35 (0.95) 0.159  |
| Visceral Adiposity * ΔSleep Midpoint    | -1.96 (0.68) 0.004*             | -0.69 (0.54) 0.201 | -1.00 (1.37) 0.467              | 0.14 (1.03) 0.889  |

Data are unstandardized regression coefficients (standard error) p-value for each standard deviation increase (z-scores) associated with each independent variable (main effects without interaction in the model) and their interaction (with main effects in the model). Adjusted for sex, age, race/ethnicity, polysomnography-measured apnea/hypopnea index, actigraphy-measured sleep duration, and actigraphy-measured sleep variability. \* p-value<0.05, <sup>T</sup> 0.05<p-value<0.10
